# Supplementary material for: Mitochondrial MsrB2 serves as a switch and transducer for mitophagy
Source: PubMed Central journal article supplement (PMC6685081; doi:10.15252/emmm.201910409), 2019-07-08

## **Appendix Table of Contents**

**1. Appendix Table S1-S2**

**2. Appendix figure legends S1-S5**

**3. Appendix figures S1-S5**

## Appendix Tables

**Appendix Table S1. Clinical characteristics of healthy control and patients with type 2 DM**

|                                          | Healthy control | T2DM             |
|------------------------------------------|-----------------|------------------|
|                                          | n=8             | n=66             |
| Age (years $\pm$ SD)                     | 41.5 $\pm$ 6.3  | 57.5 $\pm$ 12.6  |
| Gender (Males/Females)                   | 8/0             | 40/26            |
| BMI (kg/m <sup>2</sup> $\pm$ SD)         | 21.8 $\pm$ 2.0  | 34.1 $\pm$ 8.6   |
| Blood glucose (mg/dL $\pm$ SD)           | 103.8 $\pm$ 4.7 | 170.7 $\pm$ 66.8 |
| HbA1c (% $\pm$ SD)                       | 5.2 $\pm$ 0.3   | 7.2 $\pm$ 1.8    |
| Systolic blood pressure (mmHg $\pm$ SD)  | 114.1 $\pm$ 5.8 | 134.6 $\pm$ 14.7 |
| Diastolic blood pressure (mmHg $\pm$ SD) | 77.4 $\pm$ 3.5  | 74.7 $\pm$ 12.7  |
| Hypertension (%)                         | 0/8 (0%)        | 47/66 (71.2%)    |
| CAD (%)                                  | 0/8 (0%)        | 17/66 (25.8%)    |
| Medications (%)                          |                 |                  |
| Aspirin                                  | 0/8 (0%)        | 32/66 (48.5%)    |
| Clopidogrel                              | 0/8 (0%)        | 3/66 (4.5%)      |
| Warfarin                                 | 0/8 (0%)        | 4/66 (6.1%)      |
| Statin                                   | 0/8 (0%)        | 41/66 (62.1%)    |
| Beta-blocker                             | 0/8 (0%)        | 30/66 (45.5%)    |
| Angiotensin converting enzyme inhibitor  | 0/8 (0%)        | 26/66 (39.4%)    |
| Angiotensin receptor blocker             | 0/8 (0%)        | 14/66 (21.2%)    |
| Insulin                                  | 0/8 (0%)        | 30/66 (45.5%)    |
| Metformin                                | 0/8 (0%)        | 21/66 (31.8%)    |
| Other anti-diabetic drugs                | 0/8 (0%)        | 8/66 (12.1%)     |
| Diuretic                                 | 0/8 (0%)        | 21/66 (31.8%)    |

**Appendix Table S2. Antibody information**

| Company        | Target           | Cat#      | Lot# | Clone #                  | Species | Titer                     |
|----------------|------------------|-----------|------|--------------------------|---------|---------------------------|
| Cell Signaling | Cleaved Caspase3 | 9661s     | 43   | D175                     | Rabbit  | 1:1000                    |
|                | Cytochrome C     | 4272S     | 6    |                          | Rabbit  | 1:1000                    |
|                | GAPDH            | 2118L     | 8    |                          | Rabbit  | 1:1000                    |
|                | Parkin           | 4211S     | 4    |                          | Mouse   | 1:1000                    |
|                | pp53(S15)        | 9284      |      |                          | Rabbit  | 1:1000 (WB)<br>1:500 (IF) |
|                | P53              | 2524      |      |                          | Mouse   | 1:1000                    |
|                | Ubiquitin        | 3936S     | 9    |                          | Mouse   | 1:1000                    |
|                | MsrB2            | Home made |      | KO mice<br>tissue tested | Rabbit  | 1:1000                    |
| Abcam          | LC3              | Ab48394   |      |                          | Rabbit  | 1:500                     |
|                | Parkin           | Ab15954   |      |                          | Rabbit  | 1:500                     |
|                | MsrB2            | Ab101513  |      |                          | Rabbit  | 1:500                     |
|                | MsrB1            | Ab71175   |      |                          | Rabbit  | 1:100                     |
|                | MsrB3            | Ab88731   |      |                          | Rabbit  | 1:100                     |
|                | MsrA             | 16803     |      |                          | Rabbit  | 1:1000                    |
| Cosmo          | LC3              |           |      | LC3 1703                 | Mouse   | 1:100 (IF)                |
| Santa cruze    | Cox4             | SC-69360  |      | G-20                     | goat    | 1:100 (IF)                |
| Sigma          | B-actin          | A5316     |      | AC-74                    | mouse   | 1:5000                    |

## Appendix figure legends

### Appendix fig S1. Identification of MsrB2 as LC3 interaction protein in human platelets.

- A. Immunoprecipitation (IP) of LC3 in human platelet w/ and w/o CCCP treatment. Western blot analysis of LC3 and silver staining for LC/mass analysis.
- B. LC3 interacting motif (LIF) in human and mouse MsrB2 protein sequence.
- C. Western blot analysis of Methionine sulfoxide reductase (Msr) A, B1, B2 and B3 in human Healthy Control (HC; 4 HC pooled) and Diabetic mellitus (DM; 10 DM pooled) platelets.

### Appendix fig S2. Expression profiles of apoptosis proteins in MsrB2 KO mice platelets.

- A. Isolated mice washed platelets used for apoptosis array. Platelets from 5 WT mice and 8 MsrB2 KO mice (CRISPR-Cas9 MsrB2 KO) in each group were pooled. Expression profiles in WT and MsrB2 KO platelets using mouse apoptosis array (R&D system). The intensity of the dot blots were analyzed by Image J software. Relative expression of apoptosis proteins in WT and MsrB2 KO platelets were displayed by fold change (compare dot intensity of MsrB2 KO with WT KO).
- B. Western blot analysis of Methionine sulfide reductase B2 (MsrB2) and Cytochrom C in WT and MsrB2 KO mice platelets. The nonparametric *t* test was performed for comparisons of 2 groups. Analysis was performed with Prism software (GraphPad Software, Inc, La Jolla, CA). A difference of  $P < 0.05$  was considered significant. (CytoC;  $**p = 0.0051$  vs. WT, n=4).

**Appendix fig S3. LC3 interacting peptide (LIF) increase HG induced apoptosis in MEG-01 cells through reduction of MsrB2 function.**

- A. Amino acid sequence of control (Tat-pep CP) and MsrB2 LIF motif peptides (LP) used for treatment.
- B. Western blot analysis of MsrB2, pp53(s15) and active caspase3 in MEG-01 cells after cell penetration peptide treatment.

**Appendix fig S4. MsrB2 and mitophagy increased by oxidative stress in human platelets.**

- A. Western blot analysis of LC3I/II, MsrB2 and Parkin in HC platelets treated with H<sub>2</sub>O<sub>2</sub> (1 mM for 1 hr) alone or with NAC (100 μM for 30 min). GAPDH was used as the loading control.
- B. Quantification analysis of LC3I/II, MsrB2 and Parkin (LC3II; \**p*=0.0382, MsrB2; \**p*=0.0269 and Parkin; \**p*=0.0208 vs. HC group in H<sub>2</sub>O<sub>2</sub>, LC3II; \**p*=0.0375, MsrB2; \**p*=0.0156 and Parkin; \**p*=0.0421 in H<sub>2</sub>O<sub>2</sub>/NAC vs. H<sub>2</sub>O<sub>2</sub> group, *n*=3 for each group).
- C. Western blot analysis of polyubiquitination in HC platelets treated with H<sub>2</sub>O<sub>2</sub> (1 mM for 1 hr) alone or with NAC (100 μM for 30 min).
- D. Western blot analysis of polyubiquitination in in HC (*n*=3) and DM (*n*=9) platelets. Quantification analysis on HC (*n*=3) and DM (*n*=9) individuals. (\**p*=0.0122 vs. HC). Actin (same sample with fig 5C) served as the loading control.
- E. MsrB2 ubiquitination assay after transient transfection of MsrB2-GFP (1 μg) w/ or w/o CCCP in HEK293. After transfection (48hrs), IP was performed using GFP-Trap bead, followed by Western blot analysis using UB and MsrB2 antibody. The nonparametric *t* test was performed for comparisons of 2 groups. Analysis was performed with Prism

software (GraphPad Software, Inc, La Jolla, CA). A difference of  $P < 0.05$  was considered significant.

#### **Appendix fig S5. MsrB2 released out from Mitochondria**

- A.** Confocal microscopy was used for co-staining after transient transfection using MsrB2-GFP and CFP-Mito plasmid DNA into H9C2 cell. After 48hrs incubation and then treated 10  $\mu$ M CCCP or DMSO. Small boxes indicate enlarged sites of colocalization of Parkin, LC3 and MsrB2 in CCCP-1 and CCCP-b panel. Arrow indicates released MsrB2 in mitochondria.
- B.** Graph indicates colocalization between MsrB2 and Mito signal. Colocalization efficiency verified in Velocity program of each cell in each group was converted to fold and compared with HC values (\*\* $p < 0.0001$  vs. HC,  $n=3$ ). The nonparametric  $t$  test was performed for comparisons of 2 groups. Analysis was performed with Prism software (GraphPad Software, Inc, La Jolla, CA). A difference of  $P < 0.05$  was considered significant.

Appendix fig. S1.

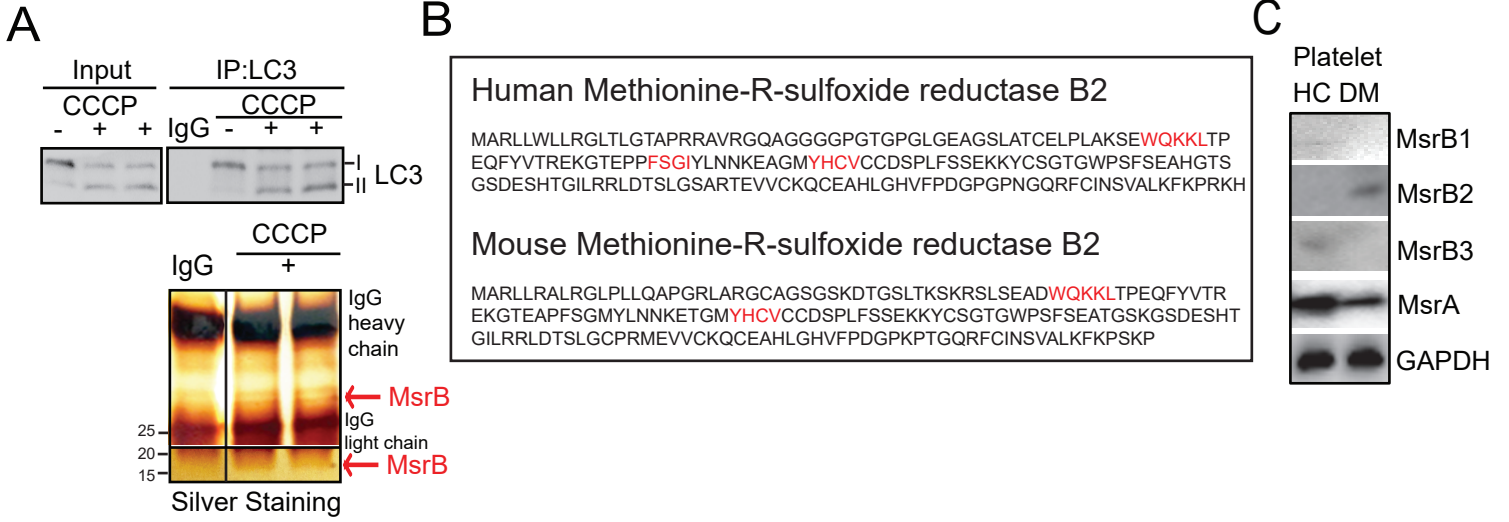

Appendix fig. S2

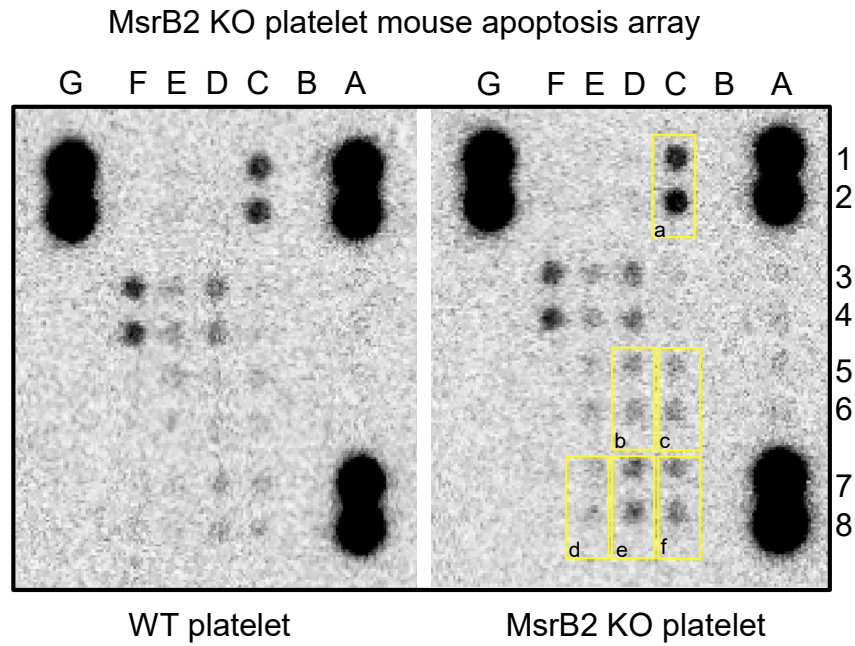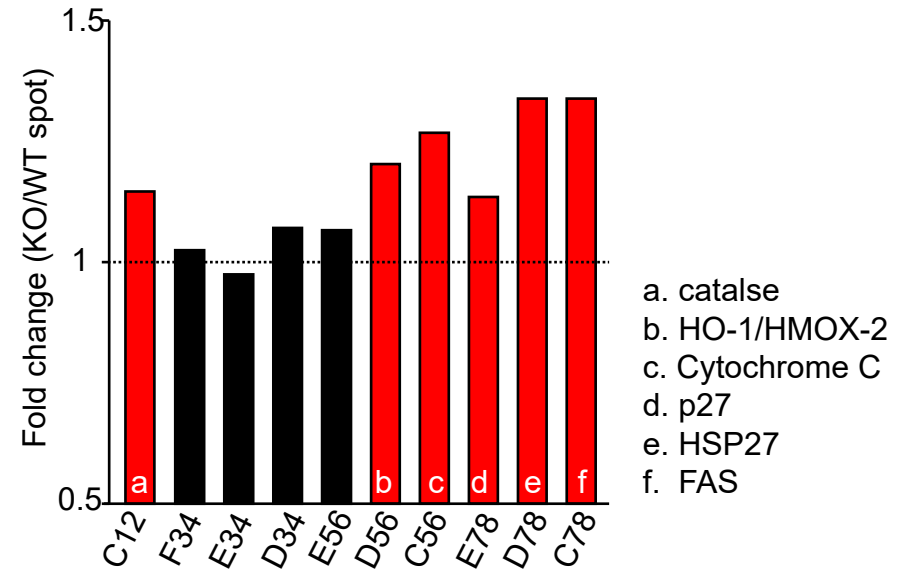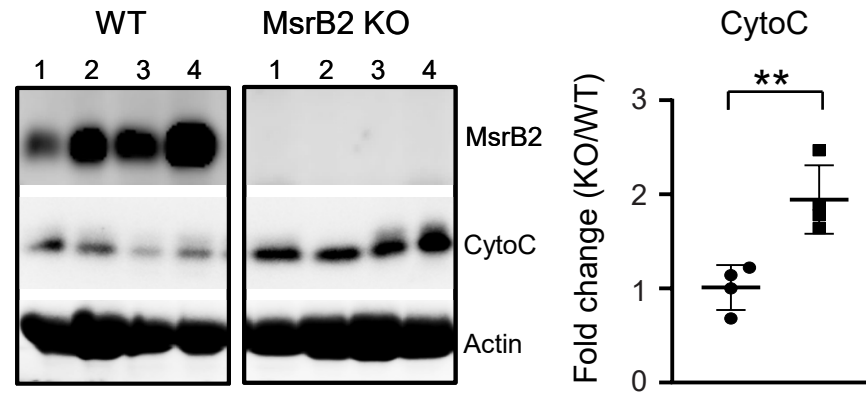



Appendix fig. S3

A

Tat-pep (CP) : NH<sub>2</sub>-GRKKRRQRRRPPQ-COOH  
 MsrB2 LIF-pep (LP) : NH<sub>2</sub>-GRKKRRQRRRPPQ-KSE WQKKLTPE-COOH  
 + NH<sub>2</sub>-GRKKRRQRRRPPQ-AGM YHCVCCD-COOH

B

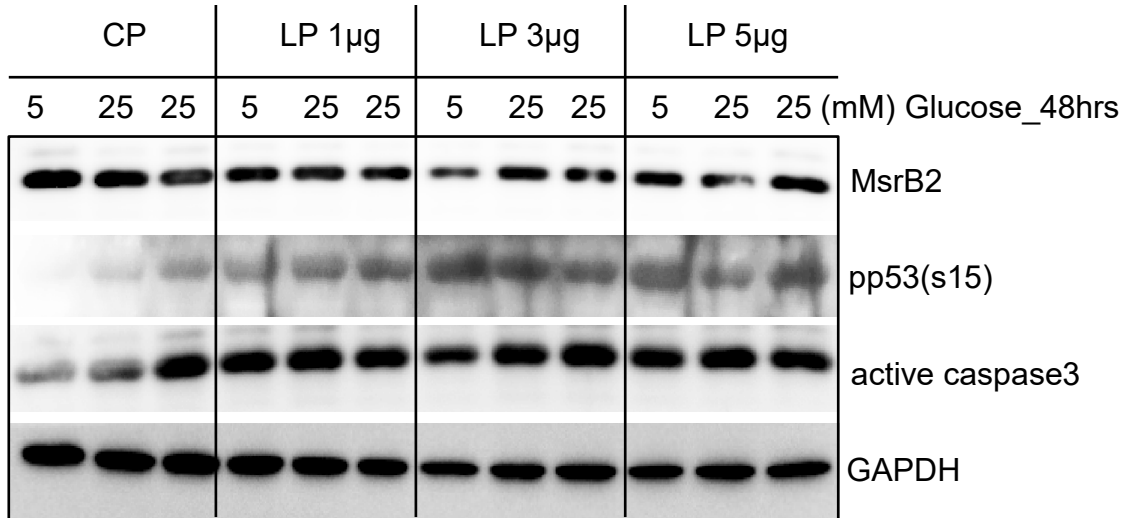

Appendix fig. S4

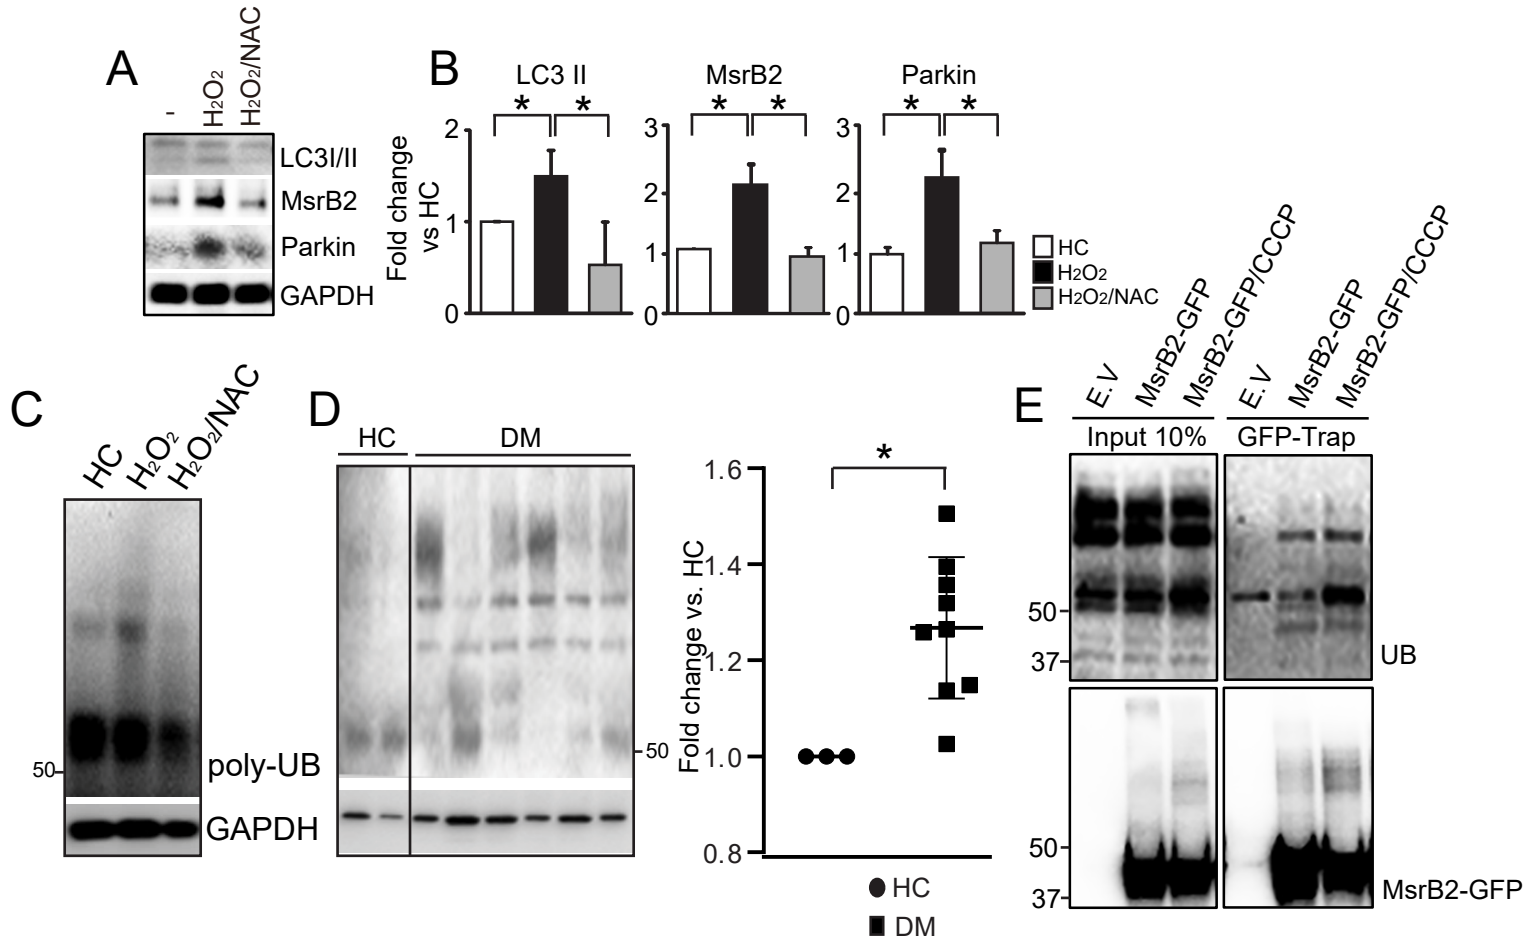

Appendix fig. S5

A

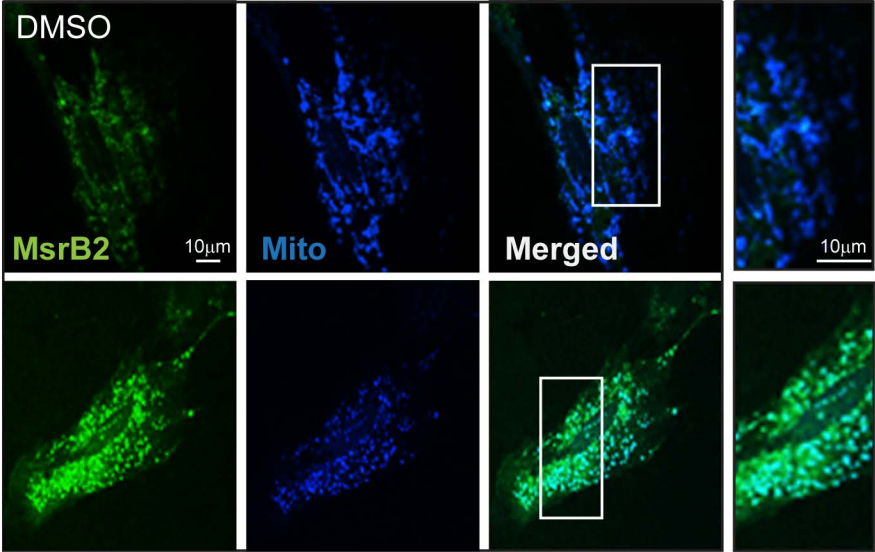

B

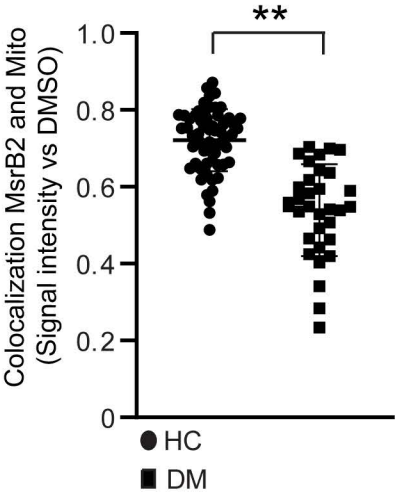

Supplement: EMMM-11-e10409-s001.pdf [file EMMM-11-e10409-s001.pdf]
