# Supplementary material for: Mitochondrial MsrB2 serves as a switch and transducer for mitophagy
Source: PubMed Central journal article supplement (PMC6685081; doi:10.15252/emmm.201910409), 2019-07-08

Figure2A

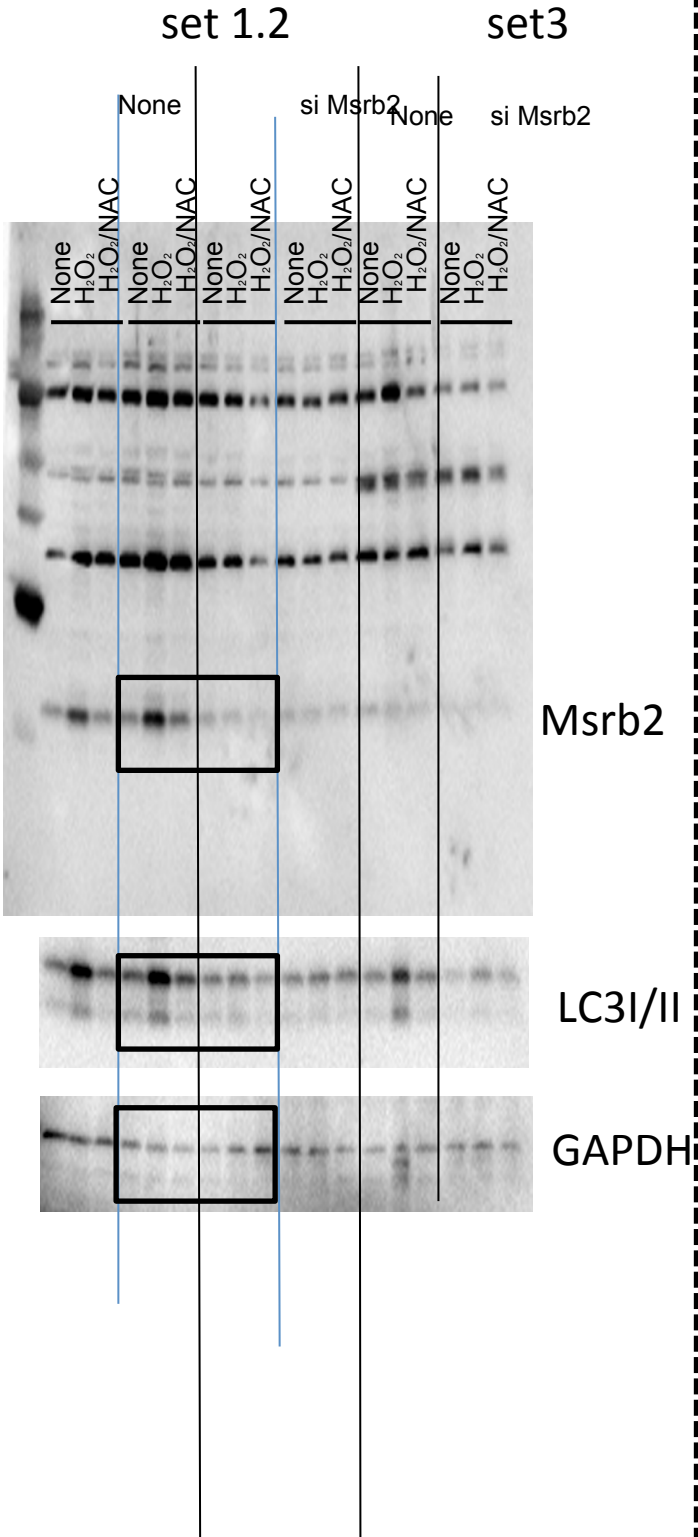

**Figure2B**

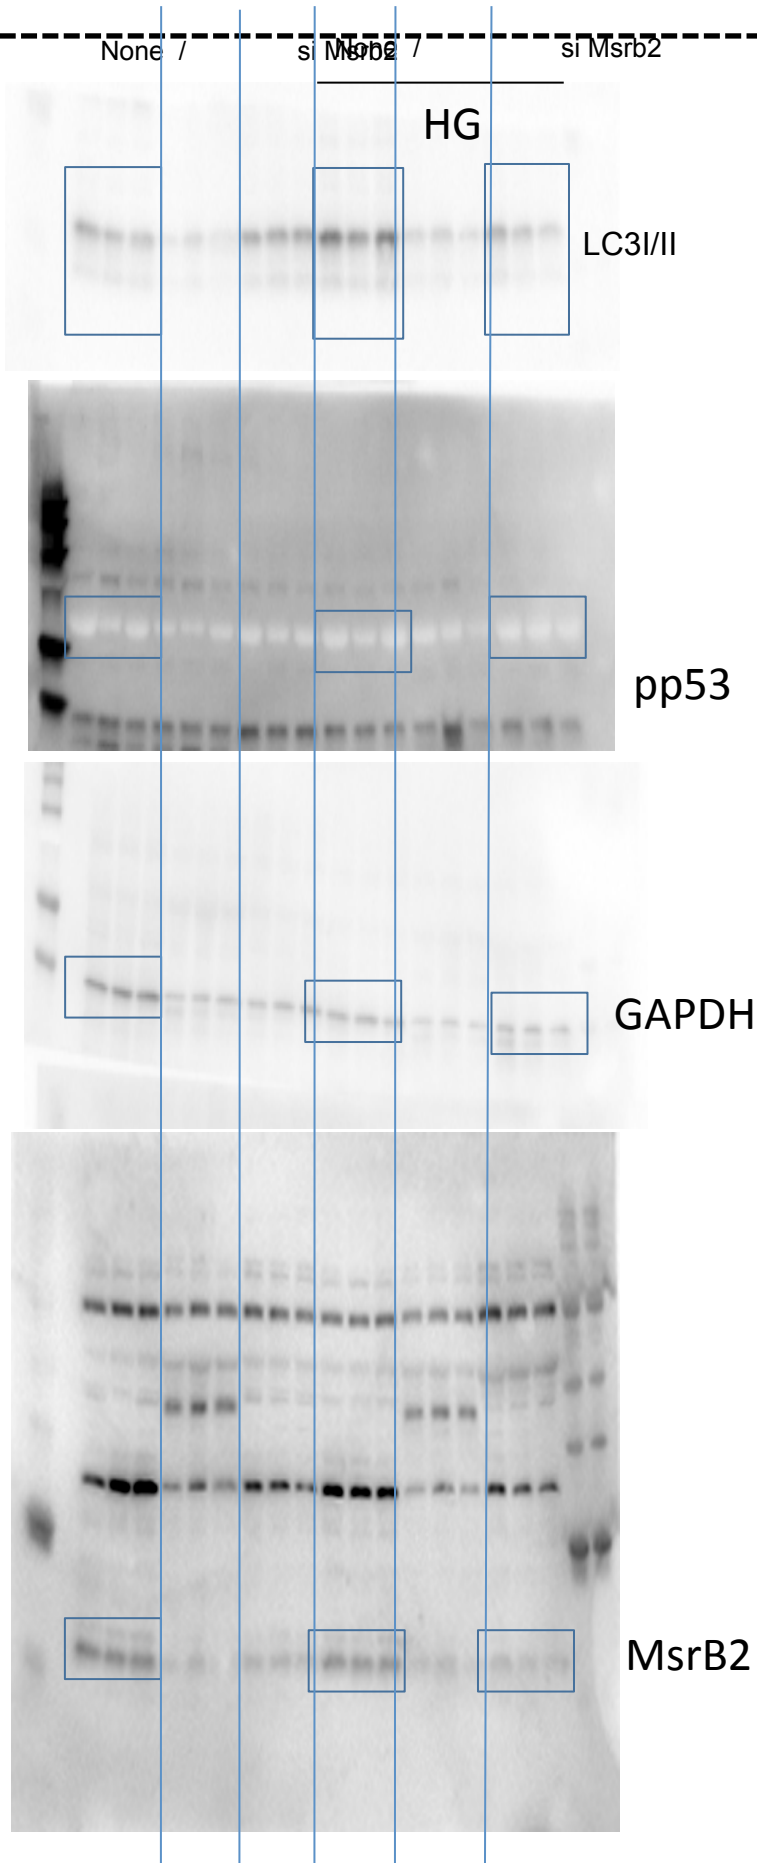

Supplement: EMMM-11-e10409-s002.pdf [file EMMM-11-e10409-s002.pdf]
